# Supplementary material for: Novel template-assembled oligosaccharide clusters as epitope mimics for HIV-neutralizing antibody 2G12. Design, synthesis, and antibody binding study
Source: Royal Society of Chemistry journal article supplement (doi:10.1039/b702961f), 2007-01-01
Supplement: b702961f.pdf [file b702961f.pdf]

# Electronic Supplementary Information

## Novel template-assembled oligosaccharide clusters as epitope mimics for HIV-neutralizing antibody 2G12. Design, synthesis, and antibody binding study

Jingsong Wang, Hengguang Li, Guozhang Zou, Lai-Xi Wang\*

Institute of Human Virology, University of Maryland, 725 W. Lombard Street, Baltimore, MD 21201

E-mail: [wangx@umbi.umd.edu](mailto:wangx@umbi.umd.edu)

\*Corresponding author:

Tel. 410-706-4982

Fax 410-706-5068

### CONTENTS:

|                                                                                                                   |      |
|-------------------------------------------------------------------------------------------------------------------|------|
| Synthesis of 2,3,4-tri-O-benzoyl-6-deoxy-6-fluoro- $\alpha$ -D-mannopyranosyl trichloroacetimidate <b>6</b> ..... | S2-4 |
| Synthesis of 2-(2-Azidoethoxy)ethyl 4,6-O-benzylidene-2-O-benzoyl - $\alpha$ -D-mannopyranoside <b>11</b> ....    | S4-6 |
| Synthesis of succinimidyl 8-azido-3,6-dioxaoctanoate <b>17</b> .....                                              | S6-8 |
| ESI-MS and HPLC profiles of glycopeptide <b>21</b> .....                                                          | S9   |
| ESI-MS and HPLC profiles of glycopeptide <b>22</b> .....                                                          | S10  |
| ESI-MS and HPLC profiles of glycopeptide <b>23</b> .....                                                          | S11  |
| ESI-MS and HPLC profiles of glycopeptide <b>24</b> .....                                                          | S12  |
| ESI-MS profile of glycopeptide <b>25</b> .....                                                                    | S13  |
| ESI-MS and HPLC profiles of glycopeptide <b>27</b> .....                                                          | S14  |

## Synthesis of 2,3,4-tri-O-benzoyl-6-deoxy-6-fluoro- $\alpha$ -D-mannopyranosyl trichloroacetimidate (6).

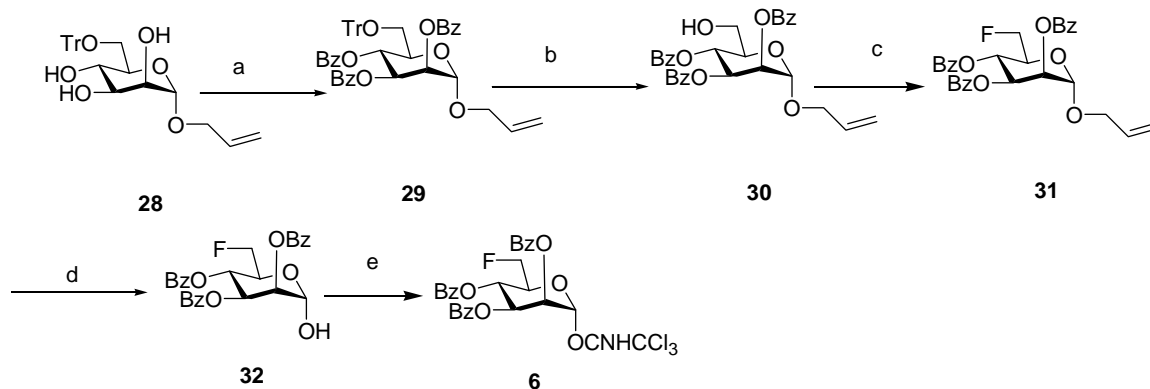

**Reagents and conditions:** a)  $BzCl/Py$ , 95%; b) 80%  $AcOH$ , 60 °C, 93%; c)  $DAST/CH_2Cl_2$ , 53%; d)  $PdCl_2/MeOH$ , 89%; e)  $CCl_3CN, DBU$ , 80%.

### Allyl 6-O-triphenylmethyl-2,3,4-tri-O-benzoyl- $\alpha$ -D-mannopyranoside (29)

To a solution of **28** (300 mg, 0.65 mmol) in dry pyridine (5 mL) was added dropwise a solution of  $BzCl$  (1 mL) in pyridine (2 mL) at 0 °C. The mixture was then stirred at rt overnight. The reaction was quenched by adding ice-water, extracted with  $CH_2Cl_2$ . The organic layer was washed with 1N HCl, brine and water, dried over  $Na_2SO_4$ , and concentrated. The residue was purified by silica gel column chromatography (Hexanes/EtOAc, 10:1) to give compound **29** (477 mg, 95%) as a white solid.  $\delta_H$  (500 MHz,  $CDCl_3$ ): 8.21-7.12 (m, 30 H, Ph), 6.10 (t, 1 H,  $J = 9.0$  Hz, H-4), 6.10-6.02 (m, 1 H,  $CH=CH_2$ ), 5.88 (dd, 1 H,  $J = 3.5, 9.0$  Hz, H-3), 5.78 (dd, 1 H,  $J = 1.5, 3.2$  Hz, H-2), 5.45 (dd, 1 H,  $J = 1.5, 16.0$  Hz,  $\frac{1}{2} CH_2=$ ), 5.35 (dd, 1 H,  $J = 1.5, 10.0$  Hz,  $\frac{1}{2} CH_2=$ ), 5.26 (d, 1 H,  $J = 1.5$  Hz, H-1), 4.46-4.20(m, 3 H, H-5,  $OCH_2CH=CH_2$ ), 3.5-3.4 (m, 2 H, H-6).  $\delta_C$  ( $CDCl_3$ , 125 MHz): 165.7, 165.6, 165.2, 143.8, 133.8, 133.5, 133.4, 133.1, 133.0, 133.0, 129.8, 129.7, 128.7, 128.6, 128.5, 128.3, 128.2, 128.7, 126.9, 118.2, 96.7, 70.9, 70.6, 70.5, 68.6, 67.1, 62.3.

### **Allyl 2,3,4,-tri-O-benzoyl- $\alpha$ -D-mannopyranoside (30)**

A solution of **29** (560 mg, 0.73 mmol) in an aqueous AcOH (80%, 20 mL) was stirred at 70 °C for 3 h. The reaction mixture was concentrated and the residue was purified by silica gel column chromatography (Hexanes/EtOAc 4:1) to give compound **30** (361 mg, 93%) as a white solid.  $\delta_{\text{H}}$  (500 MHz, CDCl<sub>3</sub>): 8.17-7.29 (m, 15 H, Ph-H), 6.08 (dd, 1 H, J = 3.0, 9.0 Hz, H-3), 6.03 (m, 1 H, CH=CH<sub>2</sub>), 5.92 (t, 1 H, J = 9.5 Hz, H-4), 5.77 (dd, 1 H, J = 1.5, 3.0 Hz, H-2), 5.44 (dd, 1 H, J = 1.5, 17 Hz,  $\frac{1}{2}$  CH<sub>2</sub>=), 5.30 (dd, 1 H, J = 1.5, 11.0 Hz,  $\frac{1}{2}$  CH<sub>2</sub>=), 5.22 (br. s, 1 H, H-1), 4.37 (m, 1 H, H-5), 4.19 (m, 2 H, CH<sub>2</sub>CH=CH<sub>2</sub>), 3.87 (m, 2 H, H-6).  $\delta_{\text{C}}$  (CDCl<sub>3</sub>, 125 MHz): 166.6, 165.6, 165.5, 133.7, 133.6, 133.2, 133.1, 130.0, 129.9, 129.7, 129.3, 129.2, 128.8, 128.7, 128.6, 128.5, 128.4, 118.4, 96.9, 71.1, 70.7, 69.8, 68.9, 67.4, 61.4.

### **Allyl 2,3,4,-tri-O-benzoyl-6-deoxy-6-fluoro- $\alpha$ -D-mannopyranoside (31)**

To a stirred solution of **30** (155 mg, 0.29 mmol) in dry CH<sub>2</sub>Cl<sub>2</sub> (5 mL) at -40 °C was added DAST (94 mg, 0.076 mL, 0.58 mmol) over 30 min. The reaction mixture was stirred at this temperature for another 30 min then at room temperature for 1h, when TLC indicated the completion of fluorination. After cooling to -20 °C, MeOH and aqueous NaHCO<sub>3</sub> were added to quench the reaction. The mixture was filtered and the filtrate was extracted with CH<sub>2</sub>Cl<sub>2</sub>. The organic layer was washed with brine and water, dried, and concentrated. The residue was purified by silica gel column chromatography (Hexanes/Hexanes 5:1) to give compound **31** (82 mg, 53%) as a white solid.  $\delta_{\text{H}}$  (500 MHz, CDCl<sub>3</sub>): 8.16-7.30 (m, 15 H, Ph), 6.02 (m, 1 H, CH=CH<sub>2</sub>), 5.96 (m, 2 H, H-3, H-4), 5.76 (dd, 1 H, J = 1.3, 3.0 Hz, H-2), 5.45 (dd, 1 H, J = 1.5, 17 Hz,  $\frac{1}{2}$  CH<sub>2</sub>=), 5.36 (dd, 1 H, J = 1.3, 11 Hz,  $\frac{1}{2}$  CH<sub>2</sub>=), 5.21 (d, 1 H, J = 1.3 Hz, H-1), 4.8-4.6 (m, 2 H, H-6), 4.4-4.2 (m, 2 H, CH<sub>2</sub>CH=CH), 4.35 (m, 1 H, H-5);  $\delta_{\text{C}}$  (CDCl<sub>3</sub>, 125 MHz): 165.6, 165.5, 165.4, 133.6, 133.2, 133.0, 130.0, 129.9, 129.8, 129.3, 129.1, 128.9, 128.7, 128.5, 128.3, 128.1, 118.6, 96.7, 81.7 (d, J<sub>C-F</sub> = 175 Hz, C-6), 70.5, 69.9, 69.8, 69.7, 68.9, 66.4, 66.3.

### **2,3,4,-Tri-O-benzoyl-6-deoxy-6-Fluoro- $\alpha$ -D-mannopyranose (32)**

To a solution of **31** (450 mg, 0.84 mmol) in anhydrous MeOH (30 mL) was added PdCl<sub>2</sub> (80 mg), the mixture was stirred at 40 °C. After 4 h, TLC (Hexanes/EtOAc 2:1) indicated the complete removal of the allyl group. The mixture was filtered through a pad of Celite, and the filtrate was concentrated. The residue was purified by flash silica gel column chromatography (Hexanes/EtOAc 4:1) to give compound **32** (370 mg, 89%) as a white foam.  $\delta_{\text{H}}$  (500 MHz, CDCl<sub>3</sub>): 8.18-7.30 (m, 15 H, Ph), 6.10 (dd, 1 H, J = 3.5, 10.0 Hz, H-3), 6.02 (t, 1 H, J = 9.8 Hz, H-4), 5.83 (dd, 1 H, J = 1.4, 3.4 Hz, H-2), 5.63 (dd, 1 H, J = 1.8, 5.0 Hz, H-1), 4.79-4.58 (m, 3 H, H-5, H-6), 4.44 (d, 1 H, J = 5.0 Hz, OH);  $\delta_{\text{C}}$  (CDCl<sub>3</sub>, 125 MHz): 165.8, 165.7, 165.7, 133.7, 133.6, 133.4, 133.3, 130.0, 130.0, 129.9, 129.8, 129.8, 129.7, 129.3, 129.0, 128.9, 128.8, 128.6, 128.5, 128.3, 92.4, 81.8 (d, J<sub>C-F</sub> = 175 Hz, C-6), 71.1, 71.0, 69.9, 69.8, 69.7, 69.6, 69.6, 69.5, 66.4.

#### **2, 3,4-tri-O-Benzoyl-6-deoxy-6-fluoro- $\alpha$ -D-mannopyranosyl trichloroacetimidate (6)**

To a solution of **32** (250 mg, 0.506 mmol) in CH<sub>2</sub>Cl<sub>2</sub> (10 mL) were added trichloroacetonitrile (0.5 mL) and DBU (0.1 mL). The mixture was stirred at rt overnight and then concentrated under vacuum. The residue was purified by flash silica gel column chromatography (Hexanes/EtOAc 4:1) to give compound **6** (259 mg, 80 %) as a white foam.  $\delta_{\text{H}}$  (500 MHz, CDCl<sub>3</sub>): 8.95 (s, 1 H, NH=CCl<sub>3</sub>), 8.18-7.30 (m, 15 H, Ph), 6.65 (d, 1 H, J = 1.8 Hz, H-1), 6.12 (t, 1 H, J = 10.0 Hz, H-4), 6.03 (dd, 1 H, J = 3.5, 10.0 Hz, H-3), 5.98 (dd, 1 H, J = 1.5, 3.5 Hz, H-2), 4.78-4.64 (m, 2 H, H-6), 4.65-4.48 (ddt, 1 H, J = 3.5, 10, 22.5 Hz, H-5);  $\delta_{\text{C}}$  (CDCl<sub>3</sub>, 125 MHz): 165.5, 165.4, 165.3, 159.8, 133.8, 133.7, 133.4, 130.1, 129.9, 129.8, 128.9, 128.8, 128.7, 128.7, 128.6, 128.4, 94.7, 90.6, 81.1 (d, J<sub>C-F</sub> = 175 Hz, C-6), 72.4, 72.3, 69.7, 68.7, 65.5, 65.4.

#### **Synthesis of 2-(2-Azidoethoxy)ethyl 4,6-O-benzylidene-2-O-benzoyl - $\alpha$ -D-mannopyranoside (11)**

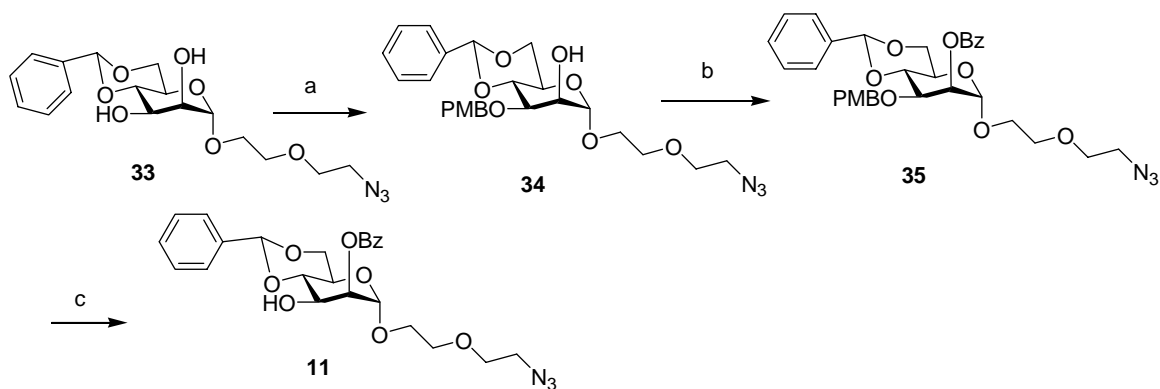

**Reagents and conditions:** a) 1)  $Bu_2SnO$ , MeOH, reflux, 2) PMBCl, TBAI, CsF, Toluene, reflux, 87%; b) BzCl/Py, 90%; c) DDQ,  $CH_2Cl_2/H_2O$ , 50%

### 2-(2-Azidoethoxy)ethyl-4,6-O-benzylidene-3-O-p-methoxybenzyl- $\alpha$ -D-mannopyranoside (**34**)

A mixture of **33** (200 mg, 0.525 mmol) and  $Bu_2SnO$  (170 mg, 0.682 mmol) in MeOH (10 mL) was heated to reflux overnight, then the solvent was removed under reduced pressure. The residue was dissolved in anhydrous toluene and PMBCl (246 mg, 1.57 mmol), TBAI (38 mg, 0.102 mmol) and CsF (151 mg, 1 mmol) were added. The mixture was heated under reflux for 4 h when TLC indicated the disappearance of the starting material. The reaction mixture was diluted with EtOAc and washed with saturated aqueous  $NaHCO_3$ , brine and water, dried over  $Na_2SO_4$ , and filtered. The filtrate was concentrated and the residue was purified by flash silica gel column chromatography (Hexanes/EtOAc 4:1) to give compound **34** (230 mg, 87 %) as a yellow syrup.  $\delta_H$  (500 MHz,  $CDCl_3$ ): 7.6-6.9 (m, 9 H, Ph), 5.7 (s, 1 H,  $PhCH=$ ), 4.95 (d, 1 H,  $J = 1.0$  Hz, H-1), 4.83 (d, 1 H,  $J = 11.5$  Hz,  $\frac{1}{2}$   $CH_2Ph$ ), 4.69 (d, 1 H,  $J = 11.5$  Hz,  $\frac{1}{2}$   $CH_2Ph$ ), 4.31 (dd, 1 H,  $J = 3.0, 9.0$  Hz, H-6), 4.15 (m, 2 H, H-2, H-4), 3.98 (dd, 1 H,  $J = 3.0, 9.5$  Hz, H-3), 3.94- 3.82 (m, 6 H), 3.73 -3.64 (m, 5 H), 3.42 (t, 2 H,  $J = 5.0$  Hz,  $CH_2N_3$ );  $\delta_C$  ( $CDCl_3$ , 125 MHz): 159.4, 137.7, 130.2, 129.6, 129.0, 128.3, 126.1, 113.9, 101.6, 100.2, 78.9, 75.3, 72.8, 70.2, 70.1, 70.0, 68.9, 66.8, 63.4, 55.3, 50.7.

### 2-(2-Azidoethoxy)ethyl-4,6-O-benzylidene-2-O-benzoyl-3-O-p-methoxybenzyl- $\alpha$ -D-mannopyranoside (**35**)

To a solution of **34** (200 mg, 0.412 mmol) in pyridine (2 mL) was added a solution of benzoyl chloride (0.2 mL) in pyridine (0.2 mL). The mixture was stirred at 0 °C for 4 h, and ice water was added to quench the reaction. After dilution with CH<sub>2</sub>Cl<sub>2</sub>, the mixture was washed with brine and water. The organic layer was dried over Na<sub>2</sub>SO<sub>4</sub>, filtered, and the filtrate was concentrated. The residue was purified by flash silica gel column chromatography (Hexanes/EtOAc 4:1) to give compound **35** (230 mg, 90%) as a white foam.  $\delta_{\text{H}}$  (500 MHz, CDCl<sub>3</sub>): 8.2-6.8 (m, 14H, Ph), 5.73 (s, 1 H, PhCH=), 5.68 (dd, 1 H, J= 3.0, 1.5 Hz, H-2), 5.04 (d, 1 H, J = 1.5 Hz, H-1), 4.73 (d, 1 H, J = 12 Hz, ½ PhCH<sub>2</sub>), 4.67 (d, 1 H, J = 12 Hz, ½ PhCH<sub>2</sub>), 4.35 (dd, 1 H, J = 5.0, 10.0 Hz, H-6), 4.22 (t, 1 H, J = 9.0 Hz, H-4), 4.20 (dd, 1 H, J = 3.0, 9.0 Hz, H-3), 4.03 (dt, 1 H, J = 4.5, 10.5 Hz, H-5), 3.98- 3.70 (m, 7 H), 3.80 (s, 3 H, CH<sub>3</sub>O), 3.45 (t, 2 H, J = 5.0 Hz, CH<sub>2</sub>N<sub>3</sub>).  $\delta_{\text{C}}$  (CDCl<sub>3</sub>, 125 MHz): 165.8, 159.2, 137.6, 133.3, 130.2, 130.2, 130.0, 129.8, 129.3, 129.0, 128.5, 128.4, 128.2, 126.2, 113.7, 101.7, 99.0, 78.7, 73.7, 71.7, 70.3, 70.2, 70.1, 68.9, 67.1, 64.0, 55.4, 50.7.

#### **2-(2-Azidoethoxy)ethyl-4,6-O-benzylidene-2-O-benzoyl- $\alpha$ -D-mannopyranoside (11)**

To a solution of **35** (200 mg, 0.33 mmol) in CH<sub>2</sub>Cl<sub>2</sub>/H<sub>2</sub>O (5 mL, 9/1) was added DDQ (90 mg), and the mixture was stirred at rt for 2 h. The mixture was then concentrated under vacuum and the residue was subject to column chromatography to give compound **11** (80 mg, 50%) as white solid.  $\delta_{\text{H}}$  (500 MHz, CDCl<sub>3</sub>): 8.2-7.4 (m, 10 H, Ph), 5.71 (s, 1 H, PhCH=), 5.68 (dd, 1 H, J = 1.5, 3.8 Hz, H-2), 5.06 (d, 1 H, J = 1.5 Hz, H-1), 4.45 (dd, 1 H, J = 3.5, 9.3 Hz, H-3), 4.37 (dd, 1 H, J = 4.5, 11.0 Hz, H-6), 4.10 (t, 1 H, J = 9.0 Hz, H-4), 4.04 (m, 1 H, H-5), 3.96-3.72 (m, 7 H), 3.47 (t, 2 H, J = 4.5 Hz, CH<sub>2</sub>N<sub>3</sub>).  $\delta_{\text{C}}$  (CDCl<sub>3</sub>, 125 MHz): 166.1, 137.2, 133.5, 130.0, 129.6, 129.3, 128.5, 128.4, 126.3, 102.2, 98.8, 79.5, 72.6, 70.3, 70.2, 68.9, 67.6, 67.3, 63.5, 50.8. ESI-MS: m/z: calcd for C<sub>24</sub>H<sub>27</sub>N<sub>3</sub>O<sub>8</sub>: 485.5; found: 486.5 [M+H]<sup>+</sup>, 508.2 [M+Na]<sup>+</sup>.

#### **Synthesis of succinimidyl 8-azido-3,6-dioxaoctanoate (17)**

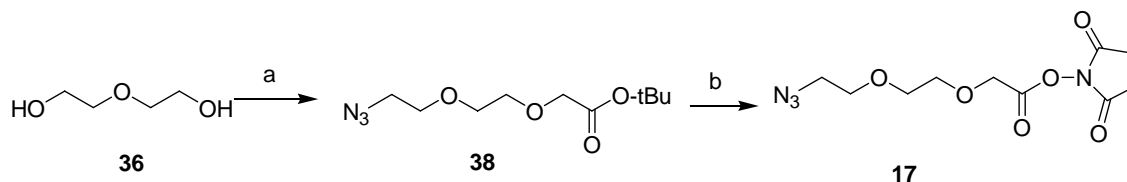

**Reagents and conditions:** a) 1)  $\text{BrCH}_2\text{COOt-Bu}$ ,  $\text{NaH/THF}$  2)  $\text{TsCl}$ ,  $\text{DIPEA}$ ,  $\text{CH}_2\text{Cl}_2$ ; 3)  $\text{NaN}_3$ ,  $\text{DMF}$ , 83%; b) 1)  $\text{TFA/CH}_2\text{Cl}_2$  1:1, 90%, 2)  $\text{NHS}$ ,  $\text{EDCI}$ ,  $\text{CH}_2\text{Cl}_2$

### tert-Butyl 8-azido-3,6-dioxaoctanoate (38)

Sodium hydride (60% suspension in mineral oil, 2.72 g, 68.0 mmol) was added in small portions to a solution of diethylene glycol (**36**) (23.0 g, 0.22 mol) in 100 mL of anhydrous THF at 0 °C. After stirring for 30 min, tert-butyl bromoacetate (13.26 g, 68.0 mmol) was added dropwise to the reaction mixture within 10 min at 0 °C, and the mixture was stirred at rt for 2 h. The volatiles were removed in vacuo. The oily residue was partitioned between brine and  $\text{CH}_2\text{Cl}_2$ . The organic layer were separated, dried over  $\text{MgSO}_4$ , and filtered. The filtrate was concentrated to give **38**, which was used in the next step without further purification.

To a solution of the above compound in  $\text{CH}_2\text{Cl}_2$  (100 mL) were added  $\text{TsCl}$  (40.0g, 0.21mol) and  $\text{DIPEA}$  (27g, 0.21mol). The mixture was stirred at rt. After 4 h, the reaction was quenched by 2N  $\text{NaOH}$ . The organic layer was separated and washed with brine and water, dried over  $\text{MgSO}_4$ , and filtered. The filtrate was concentrated and the residue was subject to column chromatography to give the tosylated compound (1.8 g). The compound was dissolved in dry  $\text{DMF}$  (100 mL) and  $\text{NaN}_3$  (0.62 g, 9.5 mmol) was added. The mixture was stirred at 40 °C for 24 h and then concentrated under vacuum. The residue was dissolved in  $\text{EtOAc}$  and washed with water. The organic layer was dried over  $\text{MgSO}_4$  and filtered. The filtrate was concentrated and the residue was subject to column chromatography to give compound **38** (0.72 g, 83%) as a colorless syrup.  $\delta_{\text{H}}$  (500 MHz,  $\text{CDCl}_3$ ): 4.09 (s, 2 H,  $\text{CH}_2\text{COOtBu}$ ), 3.81-3.74 (m, 6 H,  $\text{CH}_2\text{OCH}_2\text{CH}_2\text{O}$ ), 3.46 (t, 2 H,  $J = 5.0$  Hz,  $\text{CH}_2\text{N}_3$ ), 1.54 (s, 9 H, Ot-Bu);  $\delta_{\text{C}}$  ( $\text{CDCl}_3$ , 125 MHz): 169.6, 81.6, 70.8, 70.7, 70.0, 69.1, 50.7, 28.1.

### Succinimidyl 8-azido-3,6-dioxaoctanoate (**17**)

Compound **38** (370 mg, 1.51 mmol) was treated with TFA (2.5 mL) in CH<sub>2</sub>Cl<sub>2</sub> (2.5 mL) for 2 h at rt.

The mixture was concentrated to give the corresponding acid (260 mg, 90%) as a colorless oil.  $\delta_{\text{H}}$  (500 MHz, CDCl<sub>3</sub>): 9.50 (b, 1 H, COOH), 4.25 (s, 2 H, CH<sub>2</sub>COOt-Bu), 3.83-3.72 (m, 6 H, CH<sub>2</sub>OCH<sub>2</sub>CH<sub>2</sub>O), 3.45 (t, 2 H, J = 5.0 Hz, CH<sub>2</sub>N<sub>3</sub>);  $\delta_{\text{C}}$  (CDCl<sub>3</sub>, 125 MHz): 174.7, 71.2, 70.5, 70.1, 68.4, 50.6.

The above acid (100 mg, 0.529 mmol) and NHS (73 mg, 0.63 mmol) were dissolved in dry CH<sub>2</sub>Cl<sub>2</sub> (10 mL) and the solution was cooled to 0 °C, to which EDCI (120 mg, 0.63 mmol) was added. The mixture was stirred at rt for 4 h and concentrated to give crude **17** which was used in next step without further purification.

tetra-man-peptide, Compound 21

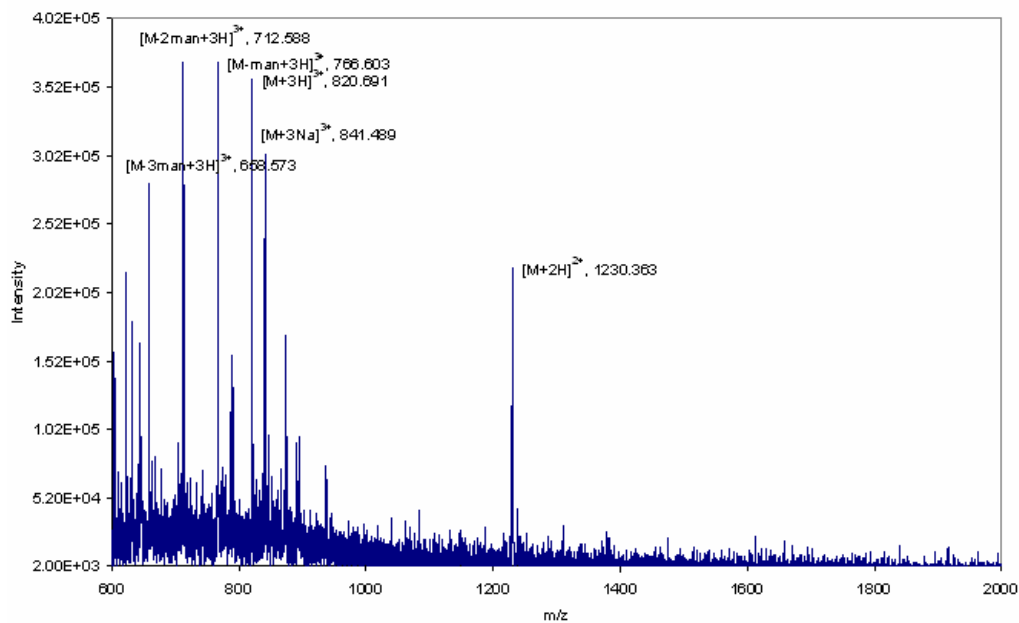

tetra-man-peptide, compound 21

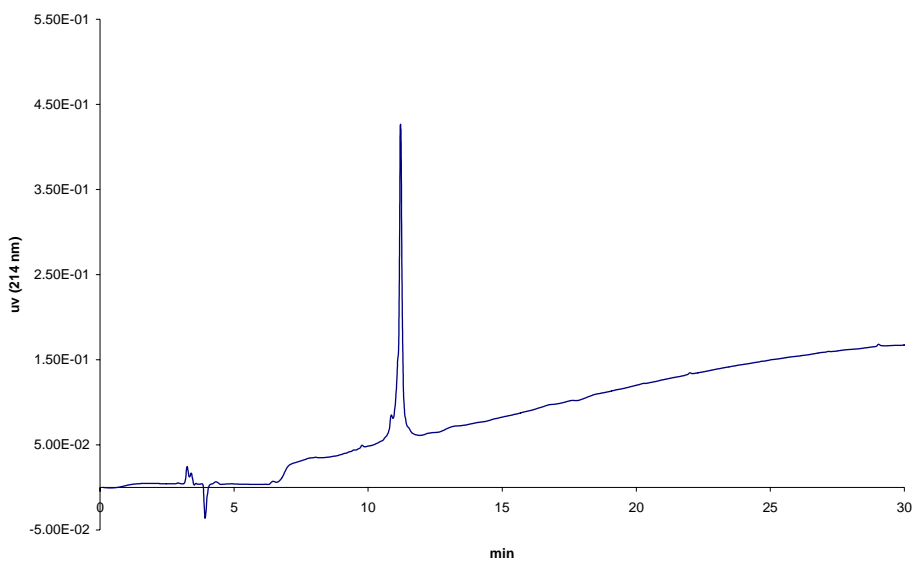

*HPLC conditions: the analytical RP-HPLC was carried out on a C18 column (3.9x150 mm) at 40 °C. The column was eluted with a linear gradient of 0-90% MeCN containing 0.1% TFA at a flow rate of 1 mL/min over 30 min, and the glycopeptides were detected at UV 214 nm.*

tetra-man4-peptide, 1585-79

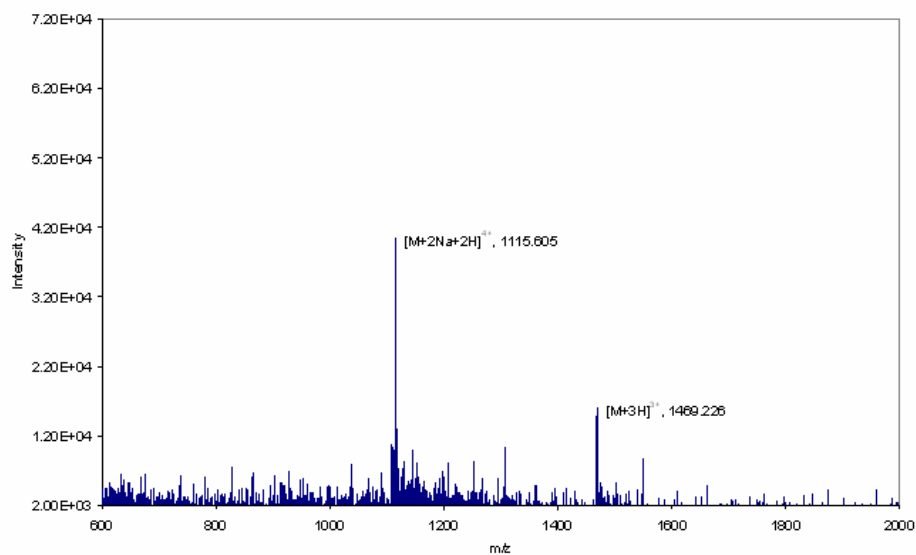

tetra-man4-peptide, compound 22

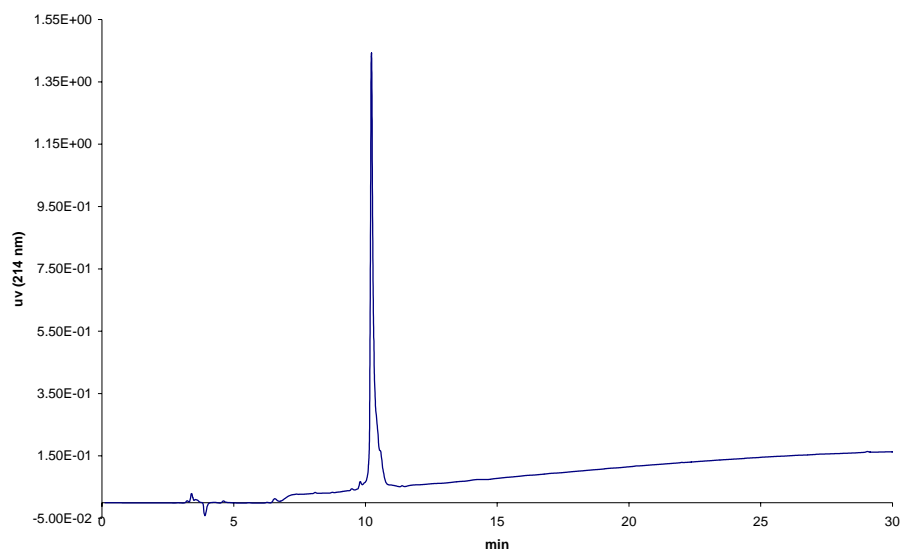

*HPLC conditions: the analytical RP-HPLC was carried out on a C18 column (3.9x150 mm) at 40 °C. The column was eluted with a linear gradient of 0-90% MeCN containing 0.1% TFA at a flow rate of 1 mL/min over 30 min, and the glycopeptides were detected at UV 214 nm.*

tetra-fluoroman4-peptide, 1585-82a

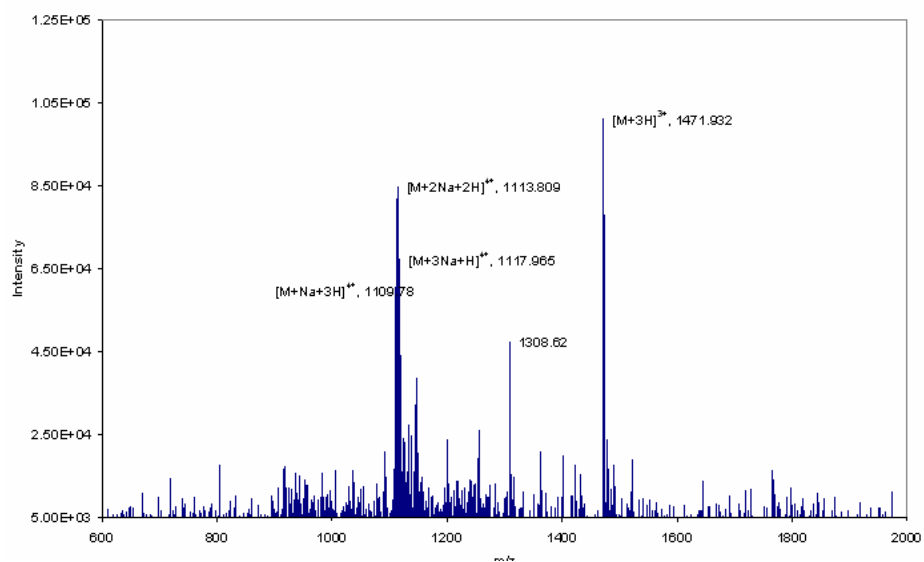

tetra-fluoro-man4-peptide, compound 23

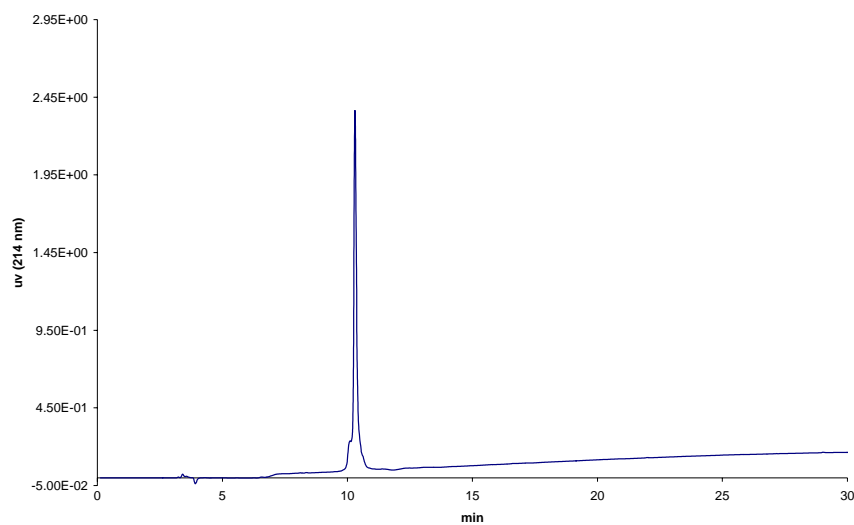

*HPLC conditions: the analytical RP-HPLC was carried out on a C18 column (3.9x150 mm) at 40 °C. The column was eluted with a linear gradient of 0-90% MeCN containing 0.1% TFA at a flow rate of 1 mL/min over 30 min, and the glycopeptides were detected at UV 214 nm.*

tetra-man4spacer-peptide, compound 24

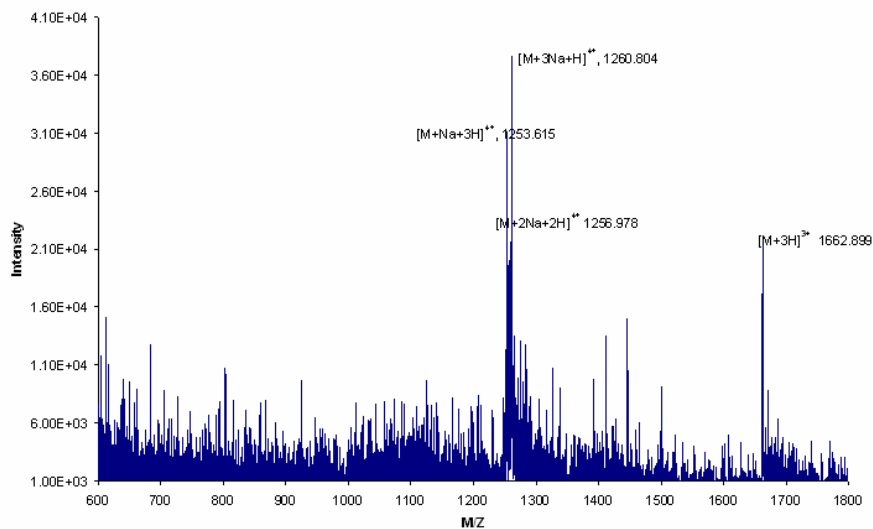

tetra-man4-spacer-peptide, compound 24

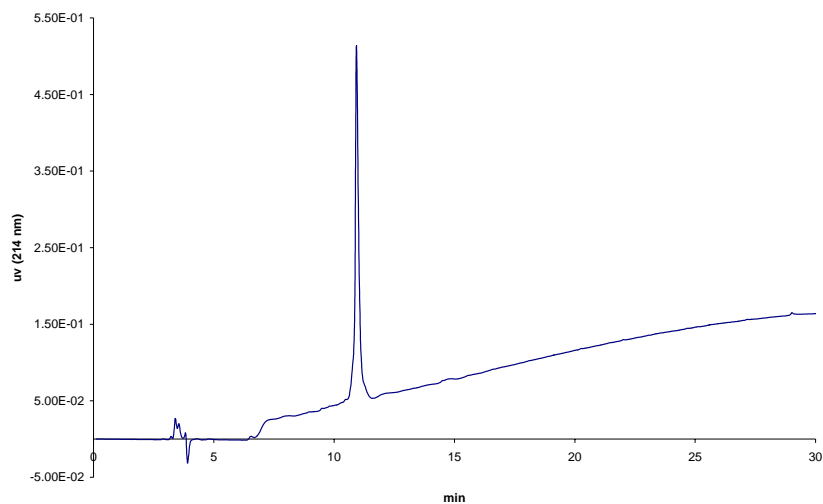

*HPLC conditions: the analytical RP-HPLC was carried out on a C18 column (3.9x150 mm) at 40 °C. The column was eluted with a linear gradient of 0-90% MeCN containing 0.1% TFA at a flow rate of 1 mL/min over 30 min, and the glycopeptides were detected at UV 214 nm.*

tetra-Fman4-peptide-dispacer, compound 25

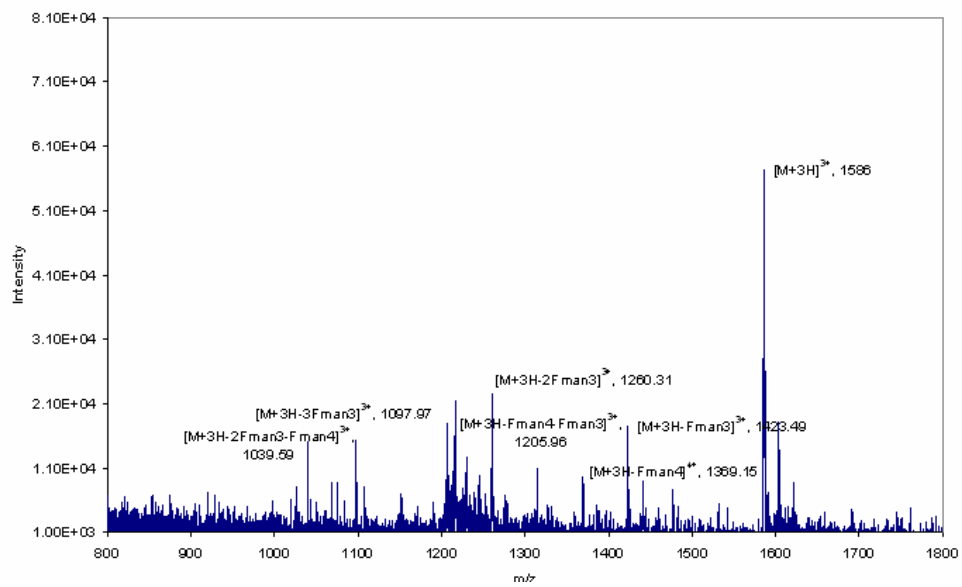

compound 27, dithelper-temp

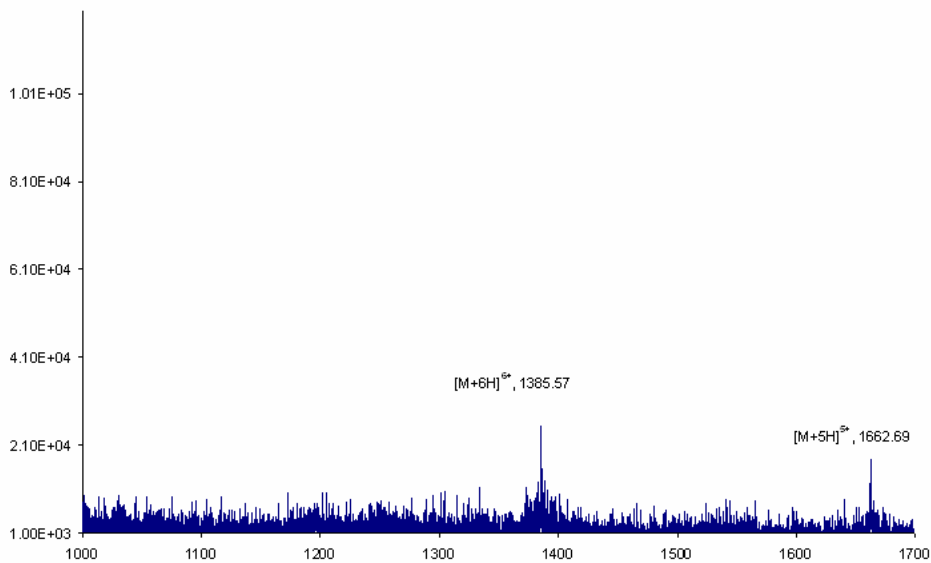

dithelper-temp, compound 27

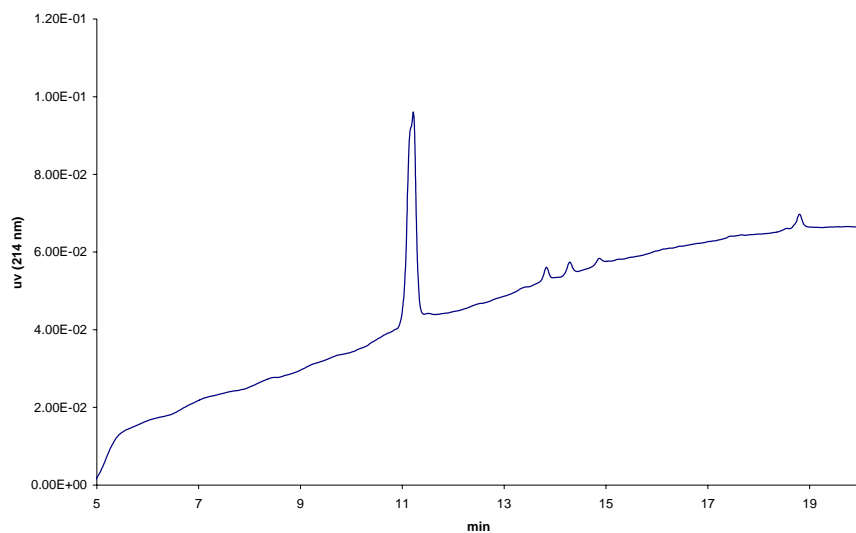

*HPLC conditions: the analytical RP-HPLC was carried out on a C18 column (3.9x150 mm) at 40 °C. The column was eluted with a linear gradient of 0-90% MeCN containing 0.1% TFA at a flow rate of 1 mL/min over 30 min, and the glycopeptides were detected at UV 214 nm.*
